# Supplementary material for: Effective Use of Mobile Electronic Medical Records by Medical Interns in Real Clinical Settings: Mixed Methods Study
Source: PubMed Central journal article supplement (PMC7772071; doi:10.2196/23622), 2020-12-15
Supplement: mhealth_v8i12e23622_app1.pdf [file mhealth_v8i12e23622_app1.pdf]

## Multimedia Appendix 1. Items on the mEMR menu

| <b>No.</b> | <b>Contents (items)</b>           |
|------------|-----------------------------------|
| 1          | Login                             |
| 2          | Patient list                      |
| 3          | OP history                        |
| 4          | OP schedule                       |
| 5          | Patient information               |
| 6          | Slip list (based on exam date)    |
| 7          | OP ledger list                    |
| 8          | Consultation list                 |
| 9          | EMR access right                  |
| 10         | Integrated EMR list               |
| 11         | Integrated EMR data               |
| 12         | Order (medicine)                  |
| 13         | Order (operation fee)             |
| 14         | PACS list                         |
| 15         | Slip list (based on order date)   |
| 16         | Exam result (based on exam date)  |
| 17         | Exam result (based on order date) |
| 18         | OPD patient list                  |
| 19         | CIS image list                    |
| 20         | CIS image                         |
| 21         | ED patient list                   |
| 22         | Vital sign                        |
| 23         | Admission schedule                |
| 24         | Note                              |
| 25         | Emergency prescription (medicine) |
| 26         | Emergency nursing report          |
| 27         | Input/output                      |
| 28         | Text result                       |
| 29         | Consultation request/response     |
| 30         | Infection information             |
| 31         | OPD prescription (medicine)       |
| 32         | Dialysis patient list             |
| 33         | Order (examination) list          |
| 34         | Intern task list                  |

- 35 Slip list (based on OPD order date)
  - 36 Exam result (based on OPD order date)
  - 37 Slip list (based on OPD exam date)
  - 38 NFC ED patient list
  - 39 Tube drain amount
  - 40 Patient search (name)
  - 41 Patient search (ID)
  - 42 My patient count badge
  - 43 Input/output
- 

**OP:** operation, **EMR:** Electronic Medical Records, **PACS:** Picture Archiving Communications System, **OPD:** outpatient department, **ED:** emergency department, **NFC:** nearfield communication
